# Supplementary material for: First complete sauropod dinosaur skull from the Cretaceous of the Americas and the evolution of sauropod dentition
Source: PubMed Central journal article supplement — Naturwissenschaften. 2010 Feb 24;97(4):379–91. doi: 10.1007/s00114-010-0650-6 (PMC2841758; doi:10.1007/s00114-010-0650-6), 2010-02-24
Supplement: 114_2010_650_MOESM5_ESM.pdf [file 114_2010_650_MOESM5_ESM.pdf]

# **Sauropod Tooth Shape Data**

**Electronic Supplementary Material 5 for:**

**“First complete sauropod dinosaur skull from the Cretaceous  
of the Americas and the evolution of sauropod dentition”**

**Daniel Chure, Brooks B. Britt, John A. Whitlock and Jeffrey A. Wilson\***

\*Author and address for correspondence:

Jeff Wilson  
Museum of Paleontology & Department of Geological Sciences  
University of Michigan  
1109 Geddes Avenue  
Ann Arbor MI 48109–1079, USA  
e: [wilsonja@umich.edu](mailto:wilsonja@umich.edu)  
tel: 734.647.7461  
fax: 734.936.1380

## Methods

Datapoints in Figure 4 represent average slenderness indices (SI) and stratigraphic occurrences for 19 “prosauropods”, 20 basal sauropods, 11 diplodocoids, and 42 macronarians. Slenderness Index is defined as the ratio of crown length to crown breadth (Upchurch 1998). Crown length was measured from crown-root junction on labial side of tooth; crown width was measured perpendicular to that. For each taxon, we measured all teeth available in the literature. Where the crown-root junction is angled with respect to the long axis of the tooth, measurements were taken from estimated mean extent of enamel. Worn teeth were reconstructed, and very damaged teeth were not included. The data for “prosauropods” are representative, not exhaustive.

## Data

The Table below presents a summary of average SI and log (average SI) for each sauropod genus in the analysis, organized major taxonomic group and listed in order of stratigraphic age. Cells are color-coded to match Figure 4; orange = “prosauropods”, yellow = basal sauropods; red = diplodocoids; blue = macronarians. Midpoints were used for uncertain ages. Abbreviations: **B**, basal sauropods; **D**, diplodocoids; **J**, Jurassic; **K**, Cretaceous; **M**, macronarians; **P**, “prosauropods”; **Tr**, Triassic.

| group | Genus                      | Period | Epoch        | Age                      | Ma    | SI   | log SI |
|-------|----------------------------|--------|--------------|--------------------------|-------|------|--------|
| P     | <i>Saturnalia</i>          | Tr     | Middle-Late  | Ladinian-Carnian         | 227.5 | 1.56 | 0.1931 |
| P     | <i>Azendohsaurus</i>       | Tr     | Late         | Carnian                  | 224   | 1.61 | 0.2072 |
| P     | Prosauropoda1              | Tr     | Late         | Carnian?                 | 224   | 2.17 | 0.3372 |
| P     | <i>Unayasaurus</i>         | Tr     | Late         | Carnian-Norian           | 218.5 | 1.86 | 0.2695 |
| P     | <i>Mussaurus</i>           | Tr     | Late         | Norian                   | 215.5 | 1.68 | 0.2264 |
| P     | <i>Plateosaurus</i>        | Tr     | Late         | Norian                   | 215.5 | 1.67 | 0.2235 |
| P     | <i>Coloradia</i>           | Tr     | Late         | Norian                   | 215.5 | 1.63 | 0.2113 |
| P     | <i>Melanorosaurus</i>      | Tr     | Late         | Norian                   | 215.5 | 1.84 | 0.2648 |
| P     | <i>Sellosaurus</i>         | Tr     | Late         | Norian                   | 215.5 | 1.91 | 0.2805 |
| P     | <i>Thecodontosaurus</i>    | Tr     | Late         | Norian-Rhaetian          | 213.5 | 2.11 | 0.3244 |
| P     | <i>Pantyraco</i>           | T-J    | Late-Early   | Carnian-Hettangian       | 214.5 | 1.83 | 0.2624 |
| P     | <i>Lufengosaurus</i>       | J      | Early        | Hettangian               | 204   | 1.70 | 0.2315 |
| P     | <i>Massospondylus</i> (AF) | J      | Early        | Hettangian-Sinemurian    | 198.5 | 2.12 | 0.3254 |
| P     | <i>Yunnanosaurus</i>       | J      | Early        | Sinemurian               | 198.5 | 1.95 | 0.2910 |
| P     | <i>Gyposaurus?</i>         | J      | Early        | Sinemurian               | 198.5 | 2.19 | 0.3404 |
| P     | <i>Massospondylus</i> (NA) | J      | Early        | Sinemurian-Pleinsbachian | 196   | 1.69 | 0.2266 |
| P     | <i>Adeopapposaurus</i>     | J      | Early        | ?                        | 193   | 1.68 | 0.2253 |
| P     | <i>Yimenosaurus</i>        | J      | Early        | ?                        | 193   | 2.43 | 0.3848 |
| P     | <i>Anchisaurus</i>         | J      | Early-Middle | Pleinsbachian-Bajocian   | 183   | 2.14 | 0.3304 |
| B     | <i>Vulcanodon</i>          | J      | Early        | Hettangian               | 204   | 1.77 | 0.2480 |
| B     | <i>Zizhongosaurus</i>      | J      | Early        | Sinemurian-Pleinsbachian | 201   | 2.05 | 0.3119 |
| B     | <i>Kunmingosaurus</i>      | J      | Early        | Sinemurian-Pleinsbachian | 201   | 1.96 | 0.2915 |
| B     | <i>Barapasaurus</i>        | J      | Early        | Hettangian-Toarcian      | 193   | 2.01 | 0.3032 |
| B     | <i>Gongxianosaurus</i>     | J      | Early        | Pleinsbachian            | 192.5 | 1.45 | 0.1603 |
| B     | <i>Tazoudasaurus</i>       | J      | Early        | Toarcian                 | 185   | 1.61 | 0.2077 |
| B     | <i>Amygdalodon</i>         | J      | Middle       | Bajocian                 | 172   | 1.45 | 0.1626 |
| B     | <i>Datousaurus</i>         | J      | Middle       | Bajocian                 | 172   | 1.91 | 0.2819 |

| group | Genus                               | Period | Epoch       | Age                    | Ma    | SI   | log SI |
|-------|-------------------------------------|--------|-------------|------------------------|-------|------|--------|
| B     | <i>Shunosaurus</i>                  | J      | Middle      | Bajocian               | 172   | 2.31 | 0.3645 |
| B     | <i>Abrosaurus</i>                   | J      | Middle      | Bajocian               | 172   | 1.95 | 0.2897 |
| B     | <i>Chebsaurus</i>                   | J      | Middle      | ?                      | 169.5 | 2.00 | 0.3010 |
| B     | <i>Lapparentosaurus</i>             | J      | Middle      | Bathonian              | 166.5 | 1.58 | 0.1987 |
| B     | <i>Archaeodontosaurus</i>           | J      | Middle      | Bathonian              | 166.5 | 1.40 | 0.1449 |
| B     | <i>Cardiodon</i>                    | J      | Middle      | Bathonian              | 166.5 | 1.52 | 0.1811 |
| B     | <i>Atlasaurus</i>                   | J      | Middle      | Bathonian-Callovian    | 164   | 1.86 | 0.2701 |
| B     | <i>Omeisaurus</i>                   | J      | Middle      | Bathonian-Callovian    | 164   | 2.23 | 0.3474 |
| B     | <i>Cetiosauriscus</i>               | J      | Middle      | Callovian              | 162   | 1.16 | 0.0648 |
| B     | <i>Patagosaurus</i>                 | J      | Middle      | Callovian              | 162   | 1.47 | 0.1670 |
| B     | <i>Mamenchisaurus</i>               | J      | Late        | Oxfordian              | 156.5 | 2.42 | 0.3837 |
| B     | <i>Turiasaurus</i>                  | J      | Late        | Tithonian-Berriasian   | 144   | 1.25 | 0.0953 |
| B     | <i>Jobaria</i>                      | K      | Early       | Hauterivian-Barremian  | 127   | 1.36 | 0.1335 |
| D     | <i>Apatosaurus</i>                  | J      | Late        | Kimmeridgian-Tithonian | 149   | 4.56 | 0.6588 |
| D     | <i>Dicraeosaurus</i>                | J      | Late        | Kimmeridgian-Tithonian | 149   | 4.52 | 0.6554 |
| D     | <i>Diplodocus</i>                   | J      | Late        | Kimmeridgian-Tithonian | 149   | 5.16 | 0.7124 |
| D     | <i>Barosaurus</i>                   | J      | Late        | Kimmeridgian-Tithonian | 149   | 4.76 | 0.6776 |
| D     | <i>Amargasaurus</i>                 | K      | Early       | Hauterivian            | 129.5 | 4.52 | 0.6551 |
| D     | Dicraeosauridae1                    | K      | Early       | Barremian              | 124   | 4.27 | 0.6304 |
| D     | Rebbachisauridae1                   | K      | Early       | Barremian              | 124   | 4.39 | 0.6425 |
| D     | Rebbachisauridae2                   | K      | Early       | Barremian              | 124   | 4.93 | 0.6925 |
| D     | <i>Nigersaurus</i>                  | K      | Early       | Aptian-Albian          | 110   | 4.96 | 0.6955 |
| D     | <i>Rebbachisaurus</i>               | K      | Early       | Albian                 | 105.5 | 4.49 | 0.6522 |
| D     | <i>Limaysaurus</i>                  | K      | Late        | Albian-Cenomanian      | 99    | 5.23 | 0.7185 |
| M     | <i>Bellusaurus</i>                  | J      | Middle-Late | ?                      | 159   | 1.47 | 0.1681 |
| M     | "French"<br><i>Bothriospondylus</i> | J      | Late        | Oxfordian              | 156.5 | 2.49 | 0.3962 |
| M     | <i>Europasaurus</i>                 | J      | Late        | Kimmeridgian           | 152.5 | 2.44 | 0.3874 |

| group | Genus                     | Period | Epoch      | Age                     | Ma    | SI   | log SI |
|-------|---------------------------|--------|------------|-------------------------|-------|------|--------|
| M     | <i>Camarasaurus</i>       | J      | Late       | Kimmeridgian-Tithonian  | 149   | 1.92 | 0.2832 |
| M     | <i>Brachiosaurus</i>      | J      | Late       | Kimmeridgian-Tithonian  | 149   | 2.33 | 0.3669 |
| M     | Euhelopodidae1            | J-K    | Late-Early | Tithonian-Berriasian    | 144   | 1.71 | 0.2319 |
| M     | Titanosauriformes3        | K      | Early      | Barriasian-Hauterivian  | 135.5 | 2.22 | 0.3458 |
| M     | Brachiosaurus2            | K      | Early      | Neocomian               | 133.5 | 2.29 | 0.3607 |
| M     | <i>Phuwiangosaurus</i>    | K      | Early      | Hauterivian-Valanginian | 132   | 4.37 | 0.6405 |
| M     | <i>Aragosaurus</i>        | K      | Early      | Hauterivian             | 129.5 | 2.83 | 0.4524 |
| M     | Euhelopodidae4            | K      | Early      | Barremian               | 127   | 2.15 | 0.3321 |
| M     | <i>Ornithopsis</i>        | K      | Early      | Barremian               | 124   | 1.76 | 0.2467 |
| M     | Titanosauriformes6        | K      | Early      | Barremian               | 124   | 3.80 | 0.5798 |
| M     | Brachiosaurus3            | K      | Early      | Hauterivian-Aptian      | 122   | 1.73 | 0.2368 |
| M     | <i>Asiatosaurus</i>       | K      | Early      | ?                       | 121.5 | 1.92 | 0.2841 |
| M     | <i>Mongolosaurus</i>      | K      | Early      | ?                       | 121.5 | 3.58 | 0.5539 |
| M     | Euhelopodidae2            | K      | Early      | ?                       | 121.5 | 1.90 | 0.2776 |
| M     | <i>Euhelopus</i>          | K      | Early      | Barremian-Aptian        | 121   | 2.50 | 0.3988 |
| M     | <i>Brachiosaurus1</i>     | K      | Early      | Barremian-Aptian        | 119.5 | 2.13 | 0.3286 |
| M     | <i>Texas Pleurocoelus</i> | K      | Early      | Aptian                  | 116.5 | 3.26 | 0.5132 |
| M     | <i>Karongasaurus</i>      | K      | Early      | Aptian?                 | 116.5 | 4.06 | 0.6083 |
| M     | <i>Malawisaurus</i>       | K      | Early      | Aptian?                 | 116.5 | 3.39 | 0.5302 |
| M     | <i>Chiayusaurus</i>       | K      | Early      | Barremian-Albian        | 113   | 2.01 | 0.3040 |
| M     | <i>Astrodon</i>           | K      | Early      | Aptian-Albian           | 110   | 2.55 | 0.4060 |
| M     | <i>Ligabuesaurus</i>      | K      | Early      | Aptian-Albian           | 110   | 1.96 | 0.2923 |
| M     | <i>Abydosaurus</i>        | K      | Early      | Albian                  | 104.5 | 2.79 | 0.4454 |
| M     | Euhelopodidae3            | K      | Early      | Albian                  | 105.5 | 3.70 | 0.5678 |
| M     | <i>Borealosaurus</i>      | K      | Late       | Cenomanian-Turonian     | 94    | 3.58 | 0.5539 |
| M     | <i>Huabeisaurus</i>       | K      | Late       | ?                       | 82    | 4.39 | 0.6425 |
| M     | <i>Antarctosaurus</i>     | K      | Late       | Santonian-Campanian     | 78    | 4.94 | 0.6937 |
| M     | <i>Maxakalisaurus</i>     | K      | Late       | Campanian-Maastrichtian | 74    | 3.52 | 0.5466 |

| group | Genus                | Period | Epoch | Age                     | Ma | SI   | log SI |
|-------|----------------------|--------|-------|-------------------------|----|------|--------|
| M     | <i>Nemegtosaurus</i> | K      | Late  | Campanian-Maastrichtian | 74 | 4.36 | 0.6393 |
| M     | Titanosauriformes2   | K      | Late  | Campanian-Maastrichtian | 74 | 3.23 | 0.5098 |
| M     | <i>Alamosaurus</i>   | K      | Late  | “Lancian”               | 68 | 3.14 | 0.4969 |
| M     | <i>Laplatasaurus</i> | K      | Late  | Maastrichtian           | 68 | 3.10 | 0.4915 |
| M     | Titanosauriformes1   | K      | Late  | Maastrichtian           | 68 | 3.83 | 0.5836 |
| M     | Titanosauriformes4   | K      | Late  | Maastrichtian           | 68 | 3.18 | 0.5020 |
| M     | Titanosauriformes5   | K      | Late  | Maastrichtian           | 68 | 4.49 | 0.6522 |
| M     | <i>Ampelosaurus</i>  | K      | Late  | Maastrichtian           | 68 | 2.71 | 0.4327 |
| M     | <i>Rapetosaurus</i>  | K      | Late  | Maastrichtian           | 68 | 4.07 | 0.6096 |
| M     | <i>Titanosaurus</i>  | K      | Late  | Maastrichtian           | 68 | 6.34 | 0.8021 |

## References Cited in ESM 5

- Allain R, Aquesbi N, Dejax J, Meyer C, Monbaron M, Montenat C, Richir P, Rochdy M, Russell D, Taquet P, Moha M (2004) A basal sauropod dinosaur from the Early Jurassic of Morocco. *C R Palevol* 3:199–208.
- Apesteguía S (2007) The sauropod diversity of the La Amarga Formation (Barremian), Neuquén (Argentina). *Gondwana Res* 12:533–546.
- Attridge J, Crompton AW, Jenkins FA (1985) The southern African Liassic prosauropod *Massospondylus* discovered in North America. *J Vertebr Paleontol* 5:128–132.
- Bai Z, Yang J, Wang G (1990) A new genus of prosauropod from the Yuxi (region) of Yunnan Province. *Yuxiwenbo* 1:14–23.
- Barrett PM (1999) A sauropod dinosaur from the Lower Lufeng Formation (Lower Jurassic) of Yunnan Province, People’s Republic of China. *J Vertebr Paleontol* 19:785–787.
- Barrett PM (2004) Sauropodomorph dinosaur diversity in the upper Elliot Formation (*Massospondylus* range zone: Lower Jurassic) of South Africa. *South Afr J Sci* 100:501–503.
- Barrett PM (2006) A sauropod dinosaur tooth from the Middle Jurassic of Skye, Scotland. *Trans R Soc Edinb: Earth Sci* 97:25–29.
- Barrett PM, Upchurch P, Xiao-lin W (2005) Cranial osteology of *Lufengosaurus huenei* Young (Dinosauria: Prosauropoda) from the Lower Jurassic of Yunnan, People’s Republic of China. *J Vertebr Paleontol* 25:806–822.

- Barrett PM, Upchurch P, Zhou X-D, Wang X-L (2007) The skull of *Yunnanosaurus huangi* Young, 1942 (Dinosauria: Prosauropoda) from the Lower Lufeng Formation (Lower Jurassic) of Yunnan, China. *Zool J Linn Soc* 150:319–341.
- Barrett PM, Hasegawa Y, Manabe M, Isaji S, Matsuoka H (2002) Sauropod dinosaurs from the Lower Cretaceous of Eastern Asia: taxonomic and biogeographical implications. *Palaeontol* 45:1197–1217.
- Benton MJ, Juul L, Storrs GW, Galton PM (2000) Anatomy and systematics of the prosauropod dinosaur *Thecodontosaurus antiquus* from the Upper Jurassic of southwest England. *J Vertebr Paleontol* 20:77–108.
- Bonaparte JF (1978) *Coloradia brevis* n.g. et n.sp.(Saurischia - Prosauropoda), dinosaurio Plateosauridae de la Formacion Los Colorados, Triasico Superior de La Rioja, Argentina. *Ameghiniana* 15:327–332.
- Bonaparte JF (1986) Les dinosaures (carnosaures, allosauridés, sauropodes, cétiosauridés) du Jurassique Moyen de Cerro Cándor (Chubut, Argentine). Deuxieme partie. *Ann Paléontol* 72:325–386.
- Bonaparte JF, González Riga BJ, Apesteguía S (2006) *Ligabuesaurus leanzai* gen. et sp. nov. (Dinosauria, Sauropoda), a new titanosaur from the Lohan Cura Formation (Aptian, Lower Cretaceous) of Neuquén, Patagonia, Argentina. *Cretac Res* 27:364–376.
- Buffetaut E (2005) A new sauropod dinosaur with prosauropod-like teeth from the Middle Jurassic of Madagascar. *Bull Soc géol Fr* 176:467–473.
- Buffetaut E, Azar D, Nel A, Ziadé K (2006) First nonavian dinosaur from Lebanon: a brachiosaurid sauropod from the Lower Cretaceous of the Jezzine District. *Naturwiss* 93:444–443.
- Buffetaut E, Suteethorn V, Le Loeuff, J, Cuny G, Tong H, Khanshubha S (2002) A review of the sauropod dinosaurs of Thailand. In: Mantajit N (ed) *Proceedings of the Symposium on Geology of Thailand*. Dept of Mineral Resources, Bangkok, pp 95–101.
- Cabrera Á (1947) Saurópodo nuevo del Jurásico de Patagonia. *Notas Mus La Plata* 12:1–17.
- Canudo Ji, Ruiz-Omeñaca, JI, Barco, JL, Royo-Torres R (2002) ¿Saurópodos asiáticos en el Barremiense inferior (Creácico Inferior) de España? *Ameghiniana* 39:443–452.
- Carpenter K, Tidwell V (1998) Preliminary description of a *Brachiosaurus* skull from Felch Quarry 1, Garden Park, Colorado. *Mod Geol* 23:69–84.
- Carpenter K, Tidwell V (2005) Reassessment of the Early Cretaceous sauropod *Astrodon johnsoni* [sic] Leidy 1865 (Titanosauriformes). In: Tidwell V, Carpenter K (eds) *Thunder-Lizards: the sauropodomorph dinosaurs*. Indiana University Press, Bloomington, pp. 78–114.
- Casamiquela RM (1963) Consideraciones acerca de *Amygdalodon* Cabrera (Sauropoda, Cetiosauridae) del Jurásico Medio de la Patagonia. *Ameghiniana* 3:79–95.
- Casamiquela RM (1980) La presencia del genero *Plateosaurus* (Prosauropoda) en el Triásico superior de la Formación El Tranquilo, Patagonia. *Actas II Congr Arg Paleontol Bioestrat, I Congr Latinoam Paleontol* 1:143-158.

- Cooper MR (1981) The prosauropod dinosaur *Massospondylus carinatus* Owen from Zimbabwe: its biology, mode of life and phylogenetic significance. Occas Pap Natl Mus Monum Rhod, ser B, Nat Sci 6:689–840.
- Curry Rogers KA, Forster CA (2001) The last of the dinosaur titans: a new sauropod from Madagascar. Nature 412:530–534.
- Dong Z (1990) Sauropoda from the Kelameili Region of the Junggar Basin, Xinjiang Autonomous Region. Vertebr PalAsiat 28:43–58.
- Dong Z, Tang Z (1984) Note on a new mid-Jurassic sauropod (*Datousaurus bashanensis* gen. et sp. nov.) from Sichuan Basin, China. Vertebr PalAsiat 22:69–75.
- Dutuit JM (1972) Découverte d'un dinosaure ornithischien dans le Trias supérieur de l'Atlas occidental marocain. C R Acad Sci, ser D 275:2841–2844.
- Flynn JJ, Parrish JM, Rakotosamimanana B, Simpson W, F., Whatley RL, Wyss AR (1999) A Triassic fauna from Madagascar, including early dinosaurs. Science 286:763–765.
- Galton PM (1976) Prosauropod dinosaurs (Reptilia: Saurischia) of North America. Postilla 169:2–98.
- Galton PM (1984) Cranial anatomy of the prosauropod dinosaur *Plateosaurus* from the Knollenmergel (Middle Keuper, Upper Triassic) of Germany. I. Two complete skulls from Trossingen/Württemberg with comments on the diet. Geol Palaeontol 18:139–171.
- Galton PM (1985) Diet of prosauropod dinosaurs from the late Triassic and early Jurassic. Lethaia 18:105–123.
- Galton PM (1986) Prosauropod dinosaur *Plateosaurus* (= *Gresslyosaurus*) (Saurischia: Sauropodomorpha) from the Upper Triassic of Switzerland. Geol Paleontol 20:167–183.
- Galton PM (1998) The prosauropod dinosaur *Plateosaurus* (*Dimodosaurus*) *poligniensis* (Pidancet and Chopard 1862) (Upper Triassic, Poligny, France). Neues Jahrb Geol Paläontol Abh 207:255–288.
- Gauffre FX (1993) The prosauropod dinosaur *Azendohsaurus laaroussii* from the Upper Triassic of Morocco. Palaeontol 36:897–908.
- Gilmore CW (1933) Two new dinosaurian reptiles from Mongolia with notes on some fragmentary specimens. Am Mus Novit 679:1–20.
- Gomani EM (2005) Sauropod dinosaurs from the early Cretaceous of Malawi, Africa. Palaeontol Electron 8:1–37.
- Gow CE, Kitching JW, Raath MA (1990) Skulls of the prosauropod dinosaur *Massospondylus carinatus* Owen in the collections of the Bernard Price Institute for Palaeontological Research. Palaeontol afr 27:45–58.
- He X, Li K, Cai K, Gao Y (1984) *Omeisaurus tianfuensis*— a new species of *Omeisaurus* from Dashanpu, Zigong, Sichuan. J Chengdu Coll Geol Supp 2:13–32.
- He X, Wang C, Lui S, Zhou F, Lui T, et al. (1998) A new sauropod from the Early Jurassic in Gongxian County, South Sichuan. Acta Geol Sichuan 18:1–6.
- Holland WJ (1924) The skull of *Diplodocus*. Mem Carnegie Mus 9:379–403.
- Hou L-H, Hsiang-K'uei Y, Zhao X (1975) Fossil reptiles from Fusui, Kwangshi. Vertebr PalAsiat 13:22–35.
- Huene F von (1929) Los Saurisquios y ornitisquios de Cretacéo Argentino. An Mus La Plata 3:1–196.



- Janensch WJ (1935-36) Die Schädel der Sauropoden *Brachiosaurus*, *Barosaurus*, und *Dicraeosaurus*. *Palaeontographica* (Supp 7) 2:147–298
- Kellner AWA (1996) Remarks on Brazilian dinosaurs. *Mem Qld Mus* 39:611–626.
- Kellner AWA, Mader BJ (1997) Archosaur teeth from the Cretaceous of Morocco. *J Paleontol* 71:525–527.
- Kellner AWA, Campos DA, Azevedo SAK, Trotta MNF, Henriques DDR, Craik MMT, Silva HP (2006) On a new titanosaur sauropod from the Bauru Group, Late Cretaceous of Brazil. *Bol Mus Nac (Geol)* 74:1–31.
- Kermack D (1984) New prosauropod material from South Wales. *Zool J Linn Soc* 82:101–117.
- Kues BS, Lehman T, Rigby Jr JK (1980). The teeth of *Alamosaurus sanjuanensis*, a Late Cretaceous sauropod. *J Paleontol* 54:864–869.
- Langston W (1974) Nonmammalian Comanchean tetrapods. *Geosci Man* 8:77–186.
- Lapparent AF (1943) Les dinosauriens jurassiques de Damparis (Jura). *Mém Soc Géol Fr* 47:1–20.
- Laurent Y, Billote M, Le Loeuff J (2002) Late Maastrichtian continental vertebrates from southwestern France: correlation with marine fauna. *Palaeogeogr, Palaeoclimatol, Palaeoecol* 187:121–135.
- Laven TA (2001) Kraniale osteologie eines Sauropoden (Reptilia, Saurischia) aus dem Oberjura Norddeutschlands und dessen phylogenetische stellung. Dissertation, Johannes-Gutenberg-Universität, Mainz.
- Leal LA, Azevedo SAK, Kellner AWA, da Rosa AAS (2004) A new early dinosaur (Sauropodomorpha) from the Caturrita Formation (Late Triassic), Paraná Basin, Brazil. *Zootaxa* 690:1–24.
- Leidy J (1865) Cretaceous reptiles of the United States. *Smithson Contrib Knowl* 192:1–135.
- Le Loeuff J (1995) *Ampelosaurus atacis* (nov. gen., nov. sp.), un nouveau Titanosauridae (Dinosauria, Sauropoda) de Crétacé supérieur de la Haute Vallée de l'Aude (France). *C R Acad Sci, ser IIA* 321:693–699.
- Lim J-D, Martin LD, Baek K-S (2001) The first discovery of a brachiosaurid from the Asian continent. *Naturwiss* 88:82–84.
- Lull RS (1911) The Reptilia of the Arundel Formation. *Md Geol Surv*:171–211.
- Lydekker R (1888) Catalogue of the fossil Reptilia and Amphibia in the British Museum. Part I. Containing the orders Ornithosauria, Crocodilia, Dinosauria, Squamata, Rhynchocephalia and Pterosauria. British Museum, London, pp 1-309.
- Lydekker R (1890) On remains of small sauropodous dinosaurs from the Wealden. *Q J Geol Soc Lond* 46:182–184.
- Madsen JH, McIntosh JS, Berman DS (1995) Skull and atlas-axis complex of the Upper Jurassic sauropod *Camarasaurus* Cope (Reptilia: Saurischia). *Bull Carnegie Mus Nat Hist* 31:1–115.
- Mahammed F, Läng É, Mami L, Mekahli L, Benhamou M, Bouterfa B, Kacemi A, Chérif S-A, Chaouati H, Taquet P (2005) The “Giant of Ksour”, a Middle Jurassic sauropod dinosaur from Algeria. *C R Palevol* 4:707–714.
- Martinelli AG, Garrido AC, Forasiepi AM, Paz ER, Gurovich Y (2007) Notes on fossil remains from the Early Cretaceous Lohan Cura Formation, Neuquén Province, Argentina. *Gondwana Res* 11:537–552.

- Martínez RN (2009) *Adeopapposaurus mognai*, gen. et sp. nov (Dinosauria: Sauropodomorpha), with comments on adaptations of basal Sauropodomorpha. *J Vertebr Paleontol* 29:142–164.
- Mateer NJ, McIntosh JS (1985) A new reconstruction of the skull of *Euhelopus zdanskyi* (Saurischia, Sauropoda). *Bull. Geol. Inst. Univ. Uppsala* 11:125–132.
- McIntosh JS, Miles CA, Cloward KC, Parker JR (1996) A new nearly complete skeleton of *Camarasaurus*. *Bull Gunma Mus Nat Hist* 1:1–87.
- Monbaron M, Russell DA, Taquet P (1999) *Atlasaurus imelakei* n.g., n.sp., a brachiosaurid-like sauropod from the Middle Jurassic of Morocco. *C R Acad Sci, ser IIA* 329:519–526.
- Moser M (2003) *Plateosaurus engelhardti* Meyer, 1837 (Dinosauria, Sauropodomorpha) aus dem Feuerletten (Mittelkeuper; Obertrias) von Bayern. *Zitteliana Reihe B, Abh Bayer Staatssamml Palaeontol Geol* 24:1-186
- Naish D, Martill DM (2001) Saurischian dinosaurs 1: Sauropoda. In Martill DM, Naish D (eds) *Dinosaurs of the Isle of Wight*. The Palaeontological Association, London, pp 185–241.
- Osborn HF (1924) Sauropoda and Theropoda of the Lower Cretaceous of Mongolia. *American Museum Novitates* 128:1–7.
- Ostrom JH (1970) Stratigraphy and paleontology of the Cloverly Formation (Lower Cretaceous) of the Bighorn Basin area, Wyoming and Montana. *Peabody Mus Nat Hist Bull* 35:1–234.
- Ouyang H, Ye Y (2002) The first mamenchisaurian skeleton with complete skull: *Mamenchisaurus youngi*. Sichuan Science and Technology Press, Chengdu.
- Nowinski A (1971) *Nemegtosaurus mongoliensis* n. gen., n. sp., (Sauropoda) from the uppermost Cretaceous of Mongolia. *Palaeontol Polonica* 25:57–81.
- Pang Q, Cheng, Z (2000) A new family of sauropod dinosaur from the Upper Cretaceous of Tianzhen Shanxi Province, China. *Acta Geol Sinica* 74:117–125.
- Pol D, Powell JE (2007) New information of *Lessemsaurus sauropoides* (Dinosauria: Sauropodomorpha) from the Upper Triassic of Argentina. *Sp Pap Palaeontol* 77:223–243.
- Powell JE (1979) Sobre una asociación de dinosaurios y otras evidencias de vertebrados del Cretácico superior de la region de la Candelaria, Prov. de Salta, Argentina. *Ameghiniana* 16:191–204.
- Royo-Torres R, Cobos A, Alcalá L (2006) A giant European dinosaur and a new sauropod clade. *Science* 314:1925–1927.
- Russell DA, Zheng Z (1993) A large mamenchisaurid from the Junggar Basin, Xinjiang, People's Republic of China. *Can J Earth Sci* 30:2082–2095.
- Sander PM (1992) The Norian *Plateosaurus* bonebeds of central Europe and their taphonomy. *Palaeogeogr, Palaeoclimatol, Palaeoecol* 93:255–299.
- Santucci RM, Bertini RJ (2001) A new titanosaur from western São Paulo State, Upper Cretaceous Bauru Group, south-east Brazil. *Palaeontol* 49:59–66.
- Sanz JL (1982) A sauropod dinosaur tooth from the Lower Cretaceous of Galve (Province of Teruel, Spain). *Geobios* 15:943–949.
- Sanz JL (1985) Nouveaux gisements de dinosaures dans le Crétacé espagnol. In: *Les Dinosauriens de la Chine à la France*. Mus Hist Nat, Toulouse, pp 81–88.

- Sanz JL, Buscalioni AD, Casanovas ML, Santafé JV (1987) Dinosaurios del Cretácico inferior de Galve (Teruel, España). *Estud Geol Vol. Extraordin Galve-Temp*:45–64.
- Sereno PC, Beck AL, Dutheil DB, Larssen HCE, Lyon GH, et al. (1999) Cretaceous sauropods from the Sahara and the uneven rate of skeletal evolution among dinosaurs. *Science* 286:1342–1347.
- Sues H-D, Reisz, RR, Hinc S, Raath MA (2004) On the skull of *Massospondylus carinatus* Owen, 1854 (Dinosauria: Sauropodomorpha) from the Stormberg Group (Lower Jurassic) of South Africa. *Ann Carnegie Mus* 73:239–257.
- Sullivan RM, Lucas SG (2000) *Alamosaurus* (Dinosauria: Sauropoda) from the Late Campanian of New Mexico and its significance. *J Vertebr Paleontol* 20:400–403.
- Tang F, Jing X, Kang X, Zhang G (2001) *Omeisaurus maoianus*: a complete sauropod from Jingyuan, Sichuan. China Ocean Press, Beijing.
- Upchurch P (1998) The phylogenetic relationships of sauropod dinosaurs. *Zool J Linn Soc* 124:43–103.
- Upchurch P, Martin J (2003) The anatomy and taxonomy of *Cetiosaurus* (Saurischia, Sauropoda) from the Middle Jurassic of England. *J Vertebr Paleontol* 23:208–231.
- White TE (1958) The braincase of *Camarasaurus lentus* (Marsh). *J Paleontol* 32:477–494.
- Wilson JA, Upchurch P (2003) A revision of *Titanosaurus* Lydekker (Dinosauria- Sauropoda), the first dinosaur genus with a 'Gondwanan' distribution. *J Sys Palaeontol* 1:125–160.
- Yates AM (2003) A new species of the primitive dinosaur *Thecodontosaurus* (Saurischia: Sauropodomorpha) and its implications for the systematics of early dinosaurs. *J Sys Palaeontol* 1:1–42.
- Yates AM (2007) The first complete skull of the Triassic dinosaur *Melanorosaurus* Haughton (Sauropodomorpha: Anchisauria). *Sp Pap Palaeontol* 77:9–55.
- You H-L, Lamanna MC, Li J, Li Y (2004) A titanosaurian sauropod dinosaur with opisthocoelous caudal vertebrae from the early Late Cretaceous of Liaoning Province, China. *Acta Geol Sin* 78:907–911.
- Young CC (1948) Further notes on *Gyposaurus sinensis* Young. *Bull. Geol. Soc. China* 28:91–103.
- Young CC (1966) On a new locality of the *Lufengosaurus* of Yunnan. *Vertebr PalAsiat* 10:64–67.
- Zhang Y (1988) The Middle Jurassic dinosaur fauna from Dashanpu, Zigong, Sichuan. Sichuan Publishing House of Science and Technology, Chengdu.
- Zhang Y, Chen W (1996) Preliminary research on the classification of sauropods from the Sichuan Basin, China. *Mus North Ariz Bull* 60:97–107.
